## Expression and function of the keratinocyte integrins

Fiona M. Watt\* and Philip H. Jones

Keratinocyte Laboratory, Imperial Cancer Research Fund, P.O. Box 123, Lincoln's Inn Fields, London WC2A 3PX, UK

\*Author for correspondence

### SUMMARY

Human keratinocytes express several adhesive receptors of the integrin family. Expression is normally confined to the basal (proliferative) layer of keratinocytes, both in mature epidermis and during development. Altered expression patterns are observed during wound healing, in psoriasis and in squamous cell carcinomas. Keratinocyte integrins are subject to both transcriptional and post-translational regulation and ligand binding ability can be modulated independently of expression. Studies with cultured keratinocytes suggest a variety of

functions for the receptors: adhesion to extracellular matrix proteins, intercellular adhesion, stratification, lateral migration and the regulation of terminal differentiation. Three distinct subpopulations of basal keratinocytes, with characteristics of stem cells, transit amplifying cells and cells committed to differentiate, can be distinguished on the basis of differences in integrin expression and function.

Key words: epidermis, adhesion, differentiation

### INTRODUCTION

The process of differentiation is not confined to the embryo: throughout adult life new differentiated cells are produced to replace cells lost through death or tissue damage. In stratified squamous epithelia such as the epidermis dead, terminally differentiated cells are continually shed from the outermost layers of the tissue and replaced through proliferation of a stem cell population in the basal layer. Human epidermal keratinocytes can be grown in culture under conditions in which they form stratified sheets with the same basic organisation as epidermis *in vivo* and these can be used to study stem cell proliferation, terminal differentiation and tissue assembly (reviewed by Watt, 1988, 1989, 1991).

Recent work has highlighted the importance of the integrin family of adhesive receptors in regulating keratinocyte behaviour. Each integrin is a heterodimer of one  $\alpha$  and one  $\beta$  subunit, which are non-covalently associated (reviewed by Albelda and Buck, 1990; Hemler, 1990; Ruoslahti, 1991; Hynes, 1992). Each subunit has a large extracellular domain, a transmembrane domain and a cytoplasmic domain which is usually short and usually associates with the actin cytoskeleton. Binding of ligands, which are extracellular matrix proteins or counter-receptors of the immunoglobulin superfamily, requires both subunits; the ligand binding sites appear to be intimately associated with cation binding domains on the  $\alpha$  subunits. So far over 7 different  $\beta$  subunits and 13 different  $\alpha$  subunits have been identified and a growing number have been found to exist as two or more splice variants. An individual  $\beta$  subunit can potentially partner several different  $\alpha$  subunits and vice versa: ligand binding specificity depends, to a large extent,

on heterodimer composition. In addition, some integrins can bind several apparently structurally unrelated ligands and a given integrin expressed in two different cell types can show different ligand binding properties.

### THE KERATINOCYTE INTEGRINS

Integrins mediate attachment of keratinocytes to the basement membrane that separates the epidermis from the dermis; this specialised extracellular matrix is rich in a number of proteins and proteoglycans, including laminin, type IV collagen and epiligrin (which may be identical to kalinin) (Yurchenco and Schittny, 1990; Rousselle et al., 1991; Watt and Hotchin, 1992). The most abundant keratinocyte integrins are  $\alpha_2\beta_1$ ,  $\alpha_3\beta_1$  and  $\alpha_6\beta_4$  (see Table 1 for summary).  $\alpha_2\beta_1$  is a receptor for collagen and laminin and  $\alpha_3\beta_1$  is a receptor for laminin and epiligrin (Carter et al., 1990a,b, 1991; Staquet et al., 1990; Adams and Watt, 1991).  $\alpha_6\beta_4$  is a component of hemidesmosomes; its ligand has yet to be established unequivocally but may be laminin (Stapp et al., 1990; De Luca et al., 1990; Lee et al., 1992).

Two other keratinocyte integrins that are well characterised are  $\alpha_5\beta_1$ , a fibronectin receptor (Adams and Watt, 1990, 1991; Carter et al., 1990a), and  $\alpha_v\beta_5$ , a vitronectin receptor (Adams and Watt, 1991; Marchisio et al., 1991). Although  $\alpha_5\beta_1$  is readily detected in cultured keratinocytes it is either weakly expressed (Hertle et al., 1991, 1992) or undetectable (Peltonen et al., 1989; Nazzaro et al., 1990; Pellegrini et al., 1992) in mature epidermis. There is a low level of fibronectin in mature basement membrane (Stenman and Vaheri, 1978; Fleischmajer and Timpl, 1984) and vit-

**Table 1. Integrins expressed by keratinocytes (see text for references)**

| Integrin          | Ligand(s)          | Comments                                       |
|-------------------|--------------------|------------------------------------------------|
| $\alpha_1\beta_1$ | ?                  | Expressed in trace amounts or undetectable     |
| $\alpha_2\beta_1$ | Collagen, laminin  |                                                |
| $\alpha_3\beta_1$ | Laminin, epiligrin |                                                |
| $\alpha_5\beta_1$ | Fibronectin        |                                                |
| $\alpha_8\beta_1$ | ?                  |                                                |
| $\alpha_6\beta_4$ | Laminin?           | Component of hemidesmosomes                    |
| $\alpha_v\beta_5$ | Vitronectin        |                                                |
| $\beta_7?$        |                    | Reported expression of $\beta_7$ -related mRNA |

ronectin is reported to be absent (Reilly and Nash, 1988). However, in wounds in which the basement membrane is destroyed, fibronectin forms the provisional matrix over which keratinocytes migrate (Clark, 1990) and when placed in culture keratinocytes become adhesive to fibronectin (Grinnell, 1992).

Other integrin subunits reported to be expressed by keratinocytes include  $\alpha_1$ , which forms a heterodimer with  $\beta_1$  and is expressed in trace amounts (Belkin et al., 1990; Buck et al., 1990; Hertle et al., 1991; but see also De Luca et al., 1990; Nazzaro et al., 1990; Zambruno et al., 1991) and  $\alpha_8$ , which is moderately abundant in chick embryonic epidermis and forms a heterodimer with the  $\beta_1$  subunit (Bossy et al., 1991). A  $\beta_7$ -related mRNA has been identified in cultured mouse keratinocytes; however, its small size suggests that it is unlikely to encode full-length  $\beta_7$  protein (Yuan et al., 1992). The  $\beta_6$  integrin subunit forms a heterodimer with  $\alpha_v$  and acts as a fibronectin receptor in a range of epithelial cells (Sheppard et al., 1990; Busk et al., 1992); it is not known whether keratinocytes express  $\beta_6$ , but antibodies to  $\alpha_v$  do not block keratinocyte adhesion to fibronectin (Adams and Watt, 1991).

Variant forms of integrin subunits are believed to arise through alternative splicing; in each case the classical form is referred to as the A form. In addition to  $\beta_{1A}$ , keratinocytes express a variant known as  $\beta_{1B}$  in which a unique 12 amino acid sequence replaces the carboxy-terminal 21 amino acids of  $\beta_{1A}$  (Altruda et al., 1990; Balzac et al., 1993).  $\alpha_{6A}$  and  $\alpha_{6B}$  have unique cytoplasmic domains of 36 and 54 amino acids respectively; keratinocytes only express  $\alpha_{6A}$  (Hogervorst et al., 1993); Tamura et al., 1991). Splice variants of the  $\alpha_3$  (Tamura et al., 1991) and  $\beta_4$  (Hogervorst et al., 1990; Suzuki and Naitoh, 1990; Tamura et al., 1990) subunits have also been described. The  $\beta_4$  cDNA originally cloned from keratinocytes (Hogervorst et al., 1990) contains a 53 amino acid insert in the cytoplasmic domain not found in  $\beta_4$  cDNA from retinal pigment epithelial cells (Suzuki and Naitoh, 1990) or carcinoma cells (Tamura et al., 1990).

The cytoplasmic domains of integrins not only interact with cytoskeletal proteins but also play a role in signal transduction and can regulate the ligand binding ability of the extracellular domains (Hynes, 1992; Damsky and Werb, 1992; Adams and Watt, 1993; Juliano and Haskell, 1993). It therefore seems likely that the variant integrin subunits will have different cellular functions from the classical forms. Evidence for this has come from transfection experiments which demonstrate that although the ligand binding

properties of  $\beta_{1A}$  and  $\beta_{1B}$  are similar,  $\beta_{1B}$  does not localise in focal adhesions (Balzac et al., 1993).

## NORMAL AND ABNORMAL INTEGRIN EXPRESSION PATTERNS

Within the epidermis, integrin expression is largely confined to the basal layer of keratinocytes that are attached to the underlying basement membrane (see, for example, Wayne et al., 1988; De Strooper et al., 1989; Hertle et al., 1991, 1992; Fig. 1E). The integrin subunits tend to have a pericellular distribution, although the  $\alpha_6$  and  $\beta_4$  subunits show a relative concentration at the basement membrane zone, consistent with their association with hemidesmosomes. The  $\alpha_3$  and  $\beta_1$  subunits are expressed in embryonic epidermis prior to the initiation of stratification and do not change in abundance or distribution during subsequent development; however the other subunits (including  $\alpha_2$ ; see Fig. 1) show spatial or temporal changes in expression and it is tempting to speculate that integrins may play a role in establishing the spatial organisation of the epidermis (Hertle et al., 1991).

The distribution of integrins in stratified cultures of human keratinocytes resembles their distribution within the epidermis: expression is largely restricted to the basal layer (Nicholson and Watt, 1991; Adams and Watt, 1991). Flow cytometry can be used to analyse the relationship between integrin levels and differentiation status in individual keratinocytes, using binding of peanut lectin (PNA) as a marker of terminal differentiation (Watt and Jones, 1992). Fig. 2 shows that the  $\alpha_3$ ,  $\alpha_5$  and  $\alpha_6$  subunits are markedly down-regulated in cells that bind PNA;  $\alpha_2$  expression is also decreased, but to a lesser extent.

Although integrin expression is normally confined to basal keratinocytes, altered expression patterns have been observed in situations in which the normal balance between proliferation and terminal differentiation is perturbed. During wound healing and in psoriatic lesions integrins are expressed suprabasally by keratinocytes that have initiated terminal differentiation (Ralfkiaer et al., 1991; Hertle et al., 1992). In squamous cell carcinomas there is considerable variation in integrin expression both within and between tumours (see, for example, Peltonen et al., 1989; Wolf et al., 1990; Jones et al., 1993), but focal loss of the  $\alpha_2$ ,  $\alpha_3$ ,  $\alpha_6$  and  $\beta_4$  subunits is a common feature of poorly differentiated oral squamous cell carcinomas (Jones et al., 1993). Reduced expression of specific integrin subunits is observed in some keratinocyte lines derived from oral squamous cell carcinomas (Sugiyama et al., unpublished data) and experiments are underway to investigate whether 'repair' of the lines with appropriate integrin expression vectors has any effect on their proliferative potential and differentiation capacity (cf. Giancotti and Ruoslahti, 1990).

## TRANSCRIPTIONAL AND POSTTRANSLATIONAL REGULATION OF INTEGRIN EXPRESSION

One technique which has been used extensively to study integrin expression in keratinocytes is suspension-induced terminal differentiation (Green, 1977; Watt et al., 1988).

Cultured human keratinocytes are disaggregated and resuspended in medium made viscous by the addition of methyl cellulose: the cells remain rounded and are prevented from adhering to one another or to the culture dish. By about 5 hours in suspension, keratinocytes have withdrawn from the

cell cycle and become committed to differentiate; by 24 hours the majority of cells have initiated terminal differentiation and are expressing involucrin, a precursor of the cornified envelope that is expressed suprabasally in culture and in the upper layers of the epidermis.

When keratinocytes are placed in suspension for 24 hr there is a marked reduction in cell surface levels of integrins, although the  $\alpha_2$  subunit is not downregulated to the same extent as the other subunits (Fig. 3; Adams and Watt, 1990; Hotchin and Watt, 1992). There is a corresponding decline in integrin mRNA levels (Nicholson and Watt, 1991) which reflects a shut off of transcription of integrin genes (Hotchin and Watt, 1992). In situ hybridisation of sections of skin (Watt and Hertle, 1993) and of stratified keratinocyte cultures (Hodivala and Watt, unpublished data) shows that integrin mRNAs are localised to the basal cell layer. The absence of integrins from the surface of terminally differentiating cells does not simply reflect transcriptional regulation, however: when keratinocytes are suspended in methyl cellulose, N-linked glycosylation and intracellular transport of newly synthesised  $\beta_1$  integrins are inhibited by a mechanism that remains to be elucidated (Hotchin and Watt, 1992).

Functional downregulation of integrins precedes loss of the receptors from the cell surface. When keratinocytes become committed to terminal differentiation, at about 5 hr in suspension, the ability of the  $\beta_1$  integrins to bind extracellular matrix proteins is substantially decreased although there is no reduction in the level of integrins on the cell surface at this time (Adams and Watt, 1990). The decrease in ligand binding ability reflects functional modulation of receptors on the cell surface (Hotchin and Watt, 1992) which would be consistent with a change in receptor conformation (O'Toole et al., 1990; Faull et al., 1993; Hotchin et al., unpublished data). The decreased ability of committed cells to adhere to extracellular matrix proteins is likely to ensure that those cells are selectively expelled from the basal layer and migrate into the layer above (Adams and Watt, 1990; Fig. 4).

## FUNCTIONS OF THE KERATINOCYTE INTEGRINS

### Cell-cell and cell-extracellular matrix adhesion

The primary function of keratinocyte integrins is adhesive, but the receptors do not act simply as passive attachments to the basement membrane. As described above, functional

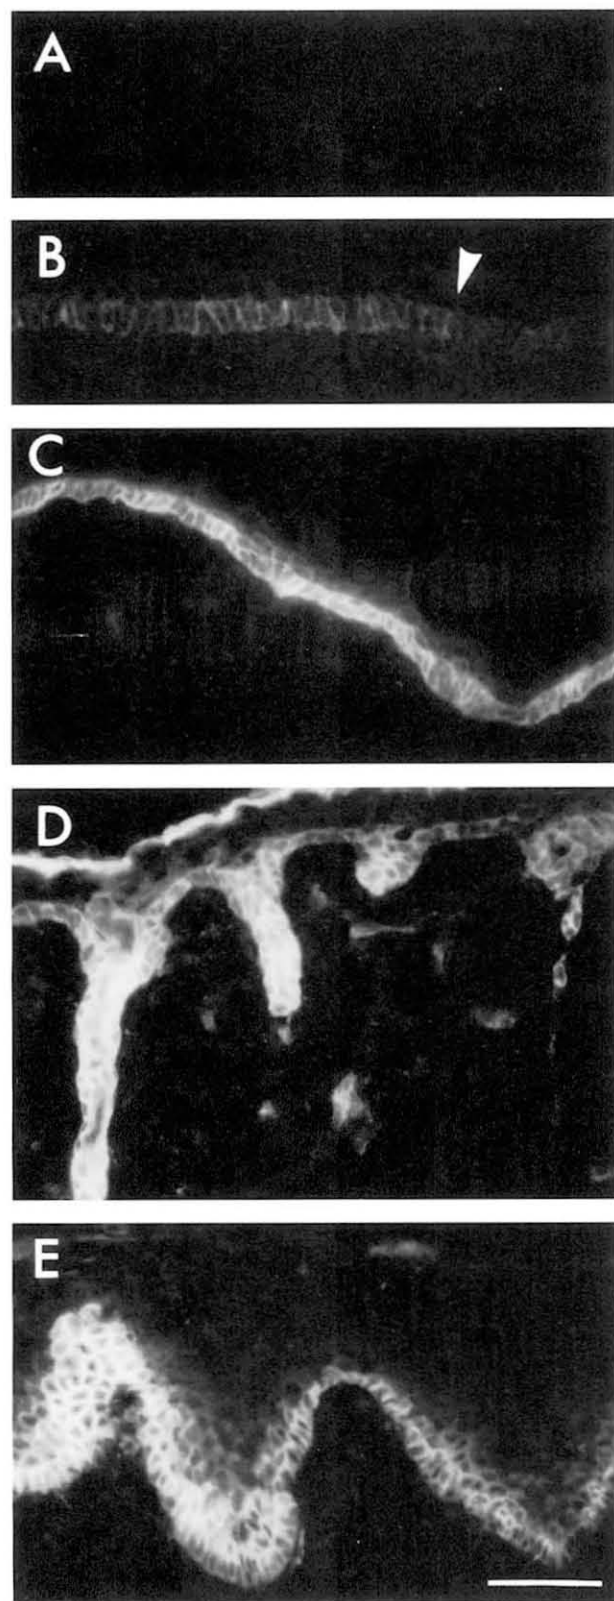

**Fig. 1.** Immunofluorescence staining shows expression of the  $\alpha_2$  integrin subunit during human epidermal development. Gestational ages are as follows. (A) 7.8 weeks; epidermis consists of one layer of keratinocytes overlaid by periderm; the  $\alpha_2$  subunit is undetectable. (B) 9.0 weeks; the epidermis still contains only one layer of keratinocytes, but the  $\alpha_2$  integrin subunit is expressed; note that  $\alpha_2$  is more abundant to the left of the arrow than to the right. (C) 10.7 weeks; stratification has begun and there are now two layers of keratinocytes; (D) 15.3 weeks; there are several suprabasal layers; note the developing sweat ducts which stain intensely; (E) neonatal epidermis. Scale bar, 50  $\mu$ m. Reproduced from Hertle et al., 1991; copyright The Company of Biologists Ltd.

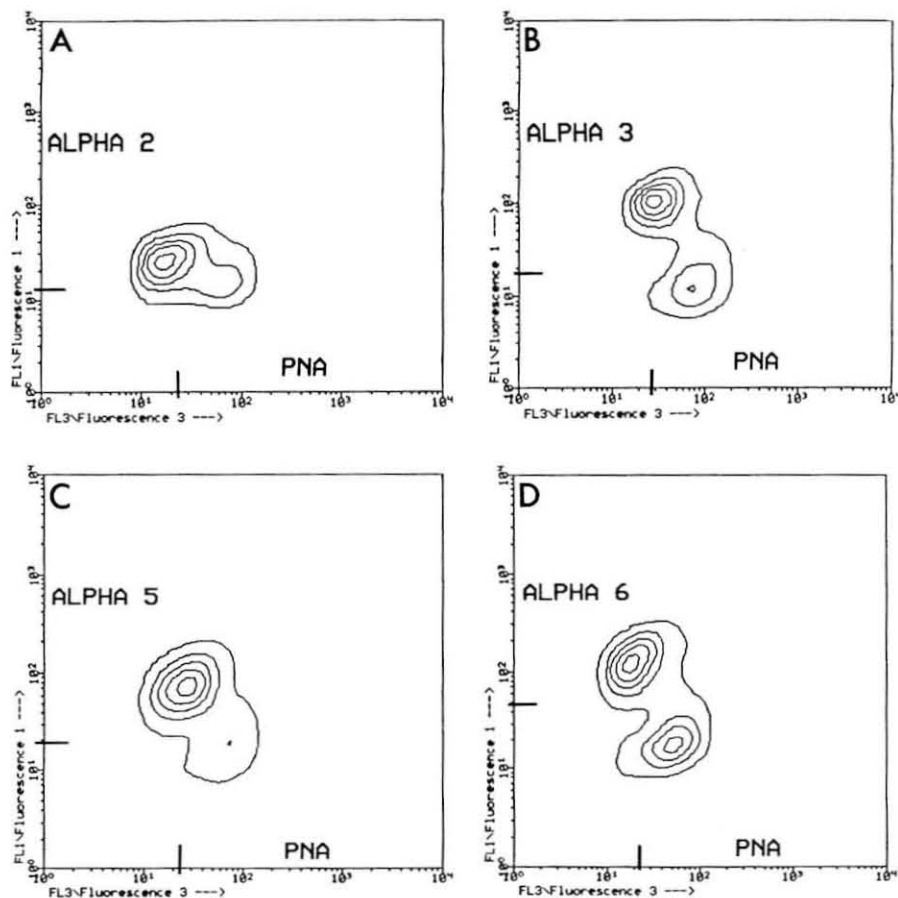

**Fig. 2.** Flow cytometer contour plots of single cell suspensions of confluent cultured keratinocytes labelled with antibodies to individual integrin subunits ( $\alpha_2$ ,  $\alpha_3$ ,  $\alpha_5$ ,  $\alpha_6$ ) and with peanut lectin (PNA) which binds specifically to terminally differentiating cells. Fluorescence is shown in arbitrary units on a log scale on both x and y axes and the number of contour lines reflects the number of cells with a given value of fluorescence. Anti- $\alpha_2$  and  $\alpha_3$  antibodies (HAS6 and VM-2, respectively) were direct FITC conjugates, anti- $\alpha_5$  and  $\alpha_6$  antibodies (mAb16 and GoH3, respectively) were detected with an FITC-conjugated anti-rat antibody. Biotinylated PNA was detected with Tricolor streptavidin (Watt and Jones, 1992). Markers on each axis show the upper limit of staining of the negative controls (CD8-FITC for  $\alpha_2$  and  $\alpha_3$ , FITC-anti rat alone for  $\alpha_5$  and  $\alpha_6$  and Tricolor alone for PNA). Note that the  $\alpha_3$  and  $\alpha_6$  subunits are markedly downregulated in cells that express a higher level of PNA (approximately a 10-fold decrease in fluorescence); the  $\alpha_5$  subunit is similarly downregulated, but the  $\alpha_2$  subunit shows a much smaller decrease in fluorescence.

downregulation of the  $\beta_1$  integrins ensures the migration of committed cells out of the basal layer (Adams and Watt, 1990). In addition, lateral migration of keratinocytes *in vitro* is mediated by integrins, implying that they play a role in wound healing *in vivo* (Kim et al., 1992; Grinnell, 1992).

Integrins are present on the lateral membranes of basal keratinocytes (see Fig. 1) and there is some evidence that they play a role in intercellular adhesion, perhaps through direct binding of  $\alpha_2\beta_1$  to  $\alpha_3\beta_1$  (Symington et al., 1993). The best characterised intercellular receptors of keratinocytes are the desmosomal and nondesmosomal cadherins (reviewed by Takeichi, 1991; Geiger and Ayalon, 1992; Buxton and Magee, 1992) which require extracellular calcium ions in order to function. In low calcium medium cell-cell contacts can be disrupted by an anti- $\beta_1$  antibody (Larjava et al., 1990); however individual anti-integrin antibodies do not block calcium-dependent aggregation of keratinocytes in suspension (Tenchini et al., 1993). Further experiments on the role of integrins in keratinocyte-keratinocyte adhesion are clearly necessary, particularly in the light of recent evidence that cadherins may play a role in the down regulation of integrin expression that occurs during terminal differentiation (Hodivala and Watt, unpublished data).

### Regulation of terminal differentiation

When keratinocytes are plated on an adhesive substrate that restricts spreading, terminal differentiation is stimulated (Watt et al., 1988) and loss of contact with the extracellular matrix may be the primary differentiation stimulus in sus-

pension (Adams and Watt, 1989). Suspension-induced terminal differentiation can be inhibited by inclusion of fibronectin or antibodies to the  $\beta_1$  integrin subunit in the methyl cellulose at the time of plating (Adams and Watt, 1989; Watt et al., 1993). However, if fibronectin is added more than 2 hr after the cells have been placed in suspension differentiation is not inhibited, because of the decrease in  $\alpha_5\beta_1$  ligand-binding ability that occurs on commitment to differentiation (Adams and Watt, 1989, 1990). Recent experiments have shown that laminin and type IV collagen, in combination with a low concentration of fibronectin, can participate in the inhibition of differentiation, as can a cocktail of function blocking antibodies (which presumably mimic receptor-ligand binding) to the  $\alpha_2$ ,  $\alpha_3$  and  $\alpha_5$  subunits (Watt et al., 1993). These observations suggest that, *in vivo*, terminal differentiation may be regulated by the total proportion of  $\beta_1$  heterodimers occupied by ligand, a decrease in that proportion acting as a stimulus for differentiation (see Fig. 4). One extension of this hypothesis is that integrins on the apical and lateral membranes of basal keratinocytes may be inactive because they are not in contact with extracellular matrix proteins (see, for example, Tenchini et al., 1993).

### Stem cells and transit amplifying cells

The epidermis is believed to contain two types of proliferating cell: stem cells, which retain a high capacity for self-renewal throughout adult life, and transit amplifying cells, which have a lower capacity for self-renewal and a high probability of undergoing terminal differentiation after a few

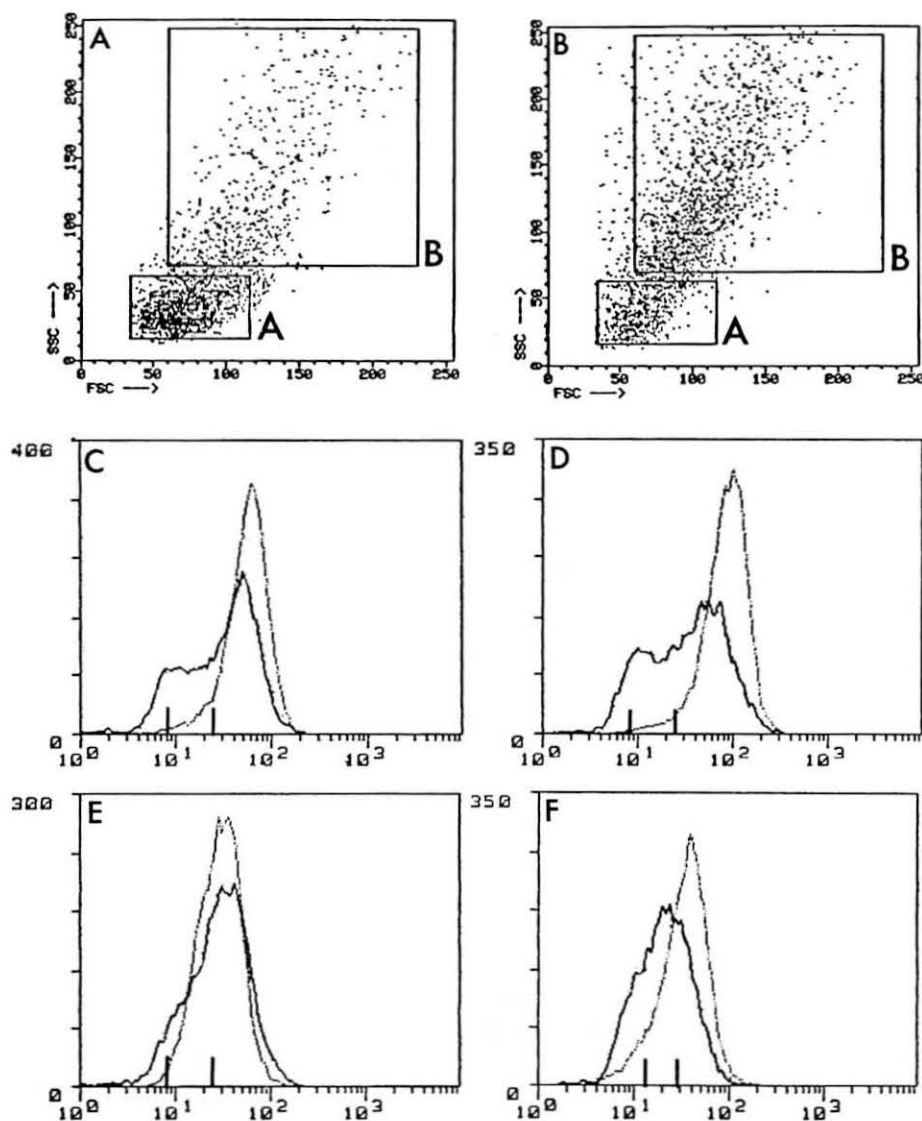

**Fig. 3.** Effects of suspension culture on integrin expression. (A,B) Dot plots showing the light scattering characteristics of a keratinocyte suspension before (A) and after (B) 24 hr of suspension culture in methyl cellulose. The forward and side light scatter (FSC and SSC respectively) are recorded in arbitrary units on a linear scale, each dot representing one cell. FSC is related to cell size and SSC to cytoplasmic complexity. Region A in each panel contains basal cells and region B contains terminally differentiating cells (Jones and Watt, 1993); there is a marked increase in the number of terminally differentiating cells after suspension. (C-F) Histograms showing the level of fluorescence of integrin subunits (C,  $\beta_1$ ; D,  $\alpha_3$ ; E,  $\alpha_2$ ; F,  $\alpha_5$ ) in cells before (dotted line) and after (solid line) 24 hr of suspension. Fluorescence is in arbitrary units on a log scale; the vertical axis is cell number. The markers show the levels of control fluorescence before (left hand marker) and after (right hand marker) suspension. There is a decrease in the modal fluorescence of  $\beta_1$ ,  $\alpha_3$  and  $\alpha_5$  integrins after 24 hr, with a second peak or a shoulder of dull cells appearing to the left of the peak seen in 0 hr cells. Cells in the integrin dull populations fall into region B on the basis of their light scatter characteristics. In contrast most  $\alpha_2$  expressing cells do not show a decrease in fluorescence. Anti-integrin antibodies are the same as in Fig. 2 ( $\alpha_2$ ,  $\alpha_3$ ,  $\alpha_5$ ) or CD29-FITC ( $\beta_1$ ).

rounds of division (reviewed by Potten, 1981; Hall and Watt, 1989). Cells with characteristics of stem cells can be isolated on the basis of high surface expression of  $\beta_1$  integrins and rapid adhesion to fibronectin, type IV collagen or keratinocyte extracellular matrix proteins (Jones and Watt, 1993; Fig. 4). There is a log linear relationship between  $\beta_1$  receptor density, as measured by flow cytometry, and the ability of keratinocytes to form colonies of 32 or more cells by 14 days in culture. Basal cells with the highest level of  $\beta_1$  integrins have about 4 times the colony forming efficiency of cells with the lowest level. There is specificity in the relationship between keratinocyte adhesiveness and proliferative capacity, since  $\alpha_6$  expression and rate of adhesion to laminin do not correlate with proliferative ability.

Cells with characteristics of transit amplifying cells adhere more slowly to the matrix proteins and express lower levels of  $\beta_1$  integrins. These cells divide 1-5 times and then initiate involucrin expression. One implication of these results is that if a reduction in the number of  $\beta_1$  integrins with bound ligand is a stimulus for terminal differentiation (Adams and Watt, 1989; Watt et al., 1993) transit cells will

be more sensitive to that stimulus than stem cells because they have fewer surface  $\beta_1$  integrins (see Fig. 4).

In a range of stratified epithelia there is indirect evidence that stem cells occupy a specific location within the basal layer (see, for example, Cotsarelis et al., 1989, 1990). It is difficult to determine the location of the high integrin-expressing putative stem cell population within the basal epidermal layer because in histological sections the staining of lateral membranes reflects integrin levels on adjacent cells. Nevertheless, non-uniform staining of the  $\alpha_2$  subunit has been reported in developing epidermis (Hertle et al., 1991; Fig. 1) and we are currently investigating whether there is variation in integrin levels in the basal layer of mature epidermis.

#### CONCLUSIONS AND PROSPECTS. INTEGRINS ARE NOT THE ONLY RECEPTORS. . .

In this review we have presented evidence that integrins have several important functions within the epidermis. It would be wrong, however, to give the impression that all

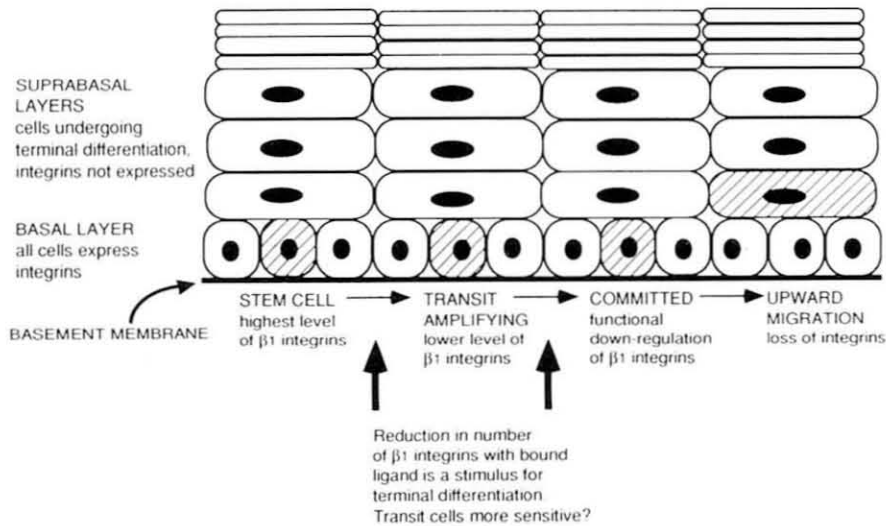

**Fig. 4.** Model of the relationship between keratinocyte adhesiveness, proliferative capacity and terminal differentiation potential. The proposed sequence of events within the basal layer of the epidermis by which a stem cell generates a suprabasal, terminally differentiating cell is shown. Reproduced from Jones and Watt (1993) with permission. Copyright Cell press.

aspects of keratinocyte behaviour can be explained in terms of integrins. There is no doubt that proliferation and terminal differentiation are profoundly affected by a variety of soluble agents, including growth factors and retinoids (reviewed by Fuchs, 1990; McKay and Leigh, 1991). In addition, the cells express other families of adhesive receptor, including the cadherins, which are undoubtedly important in regulating the adhesive properties of keratinocytes (Wheelock and Jensen, 1992; Hodivala and Watt, unpublished data). One priority for future research is to understand the interplay between different regulatory factors: extracellular matrix adhesiveness may determine keratinocyte responsiveness to growth factors; growth factors may regulate integrin expression (Adams and Watt, 1993); and the fate of stem cell progeny may be to some extent predetermined and to some extent regulated by the cellular environment (Hall and Watt, 1989).

## REFERENCES

- Adams, J. C. and Watt, F. M. (1989). Fibronectin inhibits the terminal differentiation of human keratinocytes. *Nature (Lond.)* **340**, 307-309.
- Adams, J. C. and Watt, F. M. (1990). Changes in keratinocyte adhesion during terminal differentiation: reduction in fibronectin binding precedes  $\alpha_3\beta_1$  integrin loss from the cell surface. *Cell* **63**, 425-435.
- Adams, J. C. and Watt, F. M. (1991). Expression of  $\beta_1$ ,  $\beta_3$ ,  $\beta_4$ , and  $\beta_5$  integrins by human epidermal keratinocytes and non-differentiating keratinocytes. *J. Cell Biol.* **115**, 829-841.
- Adams, J. C. and Watt, F. M. (1993). Regulation of development and differentiation by the extracellular matrix. *Development* **117**, 1183-1198.
- Albelda, S. M. and Buck, C. A. (1990). Integrins and other cell adhesion molecules. *FASEB J.* **4**, 2868-2880.
- Altruda, F., Cervella, P., Tarone, G., Botta, C., Balzac, F., Stefanuto, G. and Silengo, L. (1990). A human integrin  $\beta_1$  subunit with a unique cytoplasmic domain generated by alternative mRNA processing. *Gene* **95**, 261-266.
- Balzac, F., Belkin, A. M., Kotliansky, V. E., Balabanov, Y. V., Altruda, F., Silengo, L. and Tarone, G. (1993). Expression and functional analysis of a cytoplasmic domain variant of the  $\beta_1$  integrin subunit. *J. Cell Biol.* **121**, 171-178.
- Belkin, V. M., Belkin, A. M. and Kotliansky, V. E. (1990). Human smooth muscle VLA-1 integrin: purification, substrate specificity, localization in aorta, and expression during development. *J. Cell Biol.* **111**, 2159-2170.
- Bossy, B., Bossy-Wetzel, E. and Reichardt, L. F. (1991). Characterization of the integrin  $\alpha_8$  subunit: a new integrin  $\beta_1$ -associated subunit, which is prominently expressed on axons and on cells in contact with basal laminae in chick embryos. *EMBO J.* **10**, 2375-2385.
- Buck, C., Albelda, S., Damjanovich, L., Edelman, J., Shih, D.-T. and Solowska, J. (1990). Immunohistochemical and molecular analysis of  $\beta_1$  and  $\beta_3$  integrins. *Cell Diff. Dev.* **32**, 189-202.
- Busk, M., Pytela, R. and Sheppard, D. (1992). Characterization of the integrin  $\alpha_6\beta_6$  as a fibronectin-binding protein. *J. Biol. Chem.* **267**, 5790-5796.
- Buxton, R. S. and Magee, A. I. (1992). Structure and interactions of desmosomal and other cadherins. *Sem. Cell Biol.* **3**, 157-167.
- Carter, W. G., Wayner, E. A., Bouchard, T. S. and Kaur, P. (1990a). The role of integrins  $\alpha_2\beta_1$  and  $\alpha_3\beta_1$  in cell-cell and cell-substrate adhesion of human epidermal cells. *J. Cell Biol.* **110**, 1387-1404.
- Carter, W. G., Kaur, P., Gil, S. G., Gahr, P. J. and Wayner, E. A. (1990b). Distinct functions for integrins  $\alpha_3\beta_1$  in focal adhesions and  $\alpha_6\beta_6$ /bullous pemphigoid antigen in a new stable anchoring contact (SAC) of keratinocytes: relation to hemidesmosomes. *J. Cell Biol.* **111**, 3141-3154.
- Carter, W. G., Ryan, M. C. and Gahr, P. J. (1991). Epiligrin, a new cell adhesion ligand for integrin  $\alpha_3\beta_1$  in epithelial basement membranes. *Cell* **65**, 599-610.
- Clark, R. A. F. (1990). Fibronectin matrix deposition and fibronectin receptor expression in healing and normal skin. *J. Invest. Dermatol.* **94**, 128S-134S.
- Cotsarelis, G., Cheng, S.-Z., Dong, G., Sun, T.-T. and Lavker, R. M. (1989). Existence of slow-cycling limbal epithelial basal cells that can be preferentially stimulated to proliferate: implications on epidermal stem cells. *Cell* **57**, 201-209.
- Cotsarelis, G., Sun, T.-T. and Lavker, R. M. (1990). Label-retaining cells reside in the bulge area of pilosebaceous unit: implications for follicular stem cells, hair cycle and skin carcinogenesis. *Cell* **61**, 1329-1337.
- Damsky, C. H. and Werb, Z. (1992). Signal transduction by integrin receptors for extracellular matrix: cooperative processing of extracellular information. *Curr. Opin. Cell Biol.* **4**, 772-781.
- De Luca, M., Tamura, R. N., Kajiji, S., Bondanza, S., Rossino, P., Cancedda, R., Marchisio, P. C. and Quaranta, V. (1990). Polarized integrin mediates human keratinocyte adhesion to basal lamina. *Proc. Natl. Acad. Sci. USA* **87**, 6888-6892.
- De Strooper, B., Van Der Schueren, B., Jaspers, M., Saison, M., Spaepen, M., Van Leuven, F., Van Den Berghe, H. and Cassiman, J.-J. (1989). Distribution of the  $\beta_1$  subgroup of the integrins in human cells and tissues. *J. Histochem. Cytochem.* **37**, 299-307.
- Faull, R. J., Kovach, N. L., Harlan, J. M. and Ginsberg, M. H. (1993). Affinity modulation of integrin  $\alpha_5\beta_1$ : regulation of the functional response by soluble fibronectin. *J. Cell Biol.* **121**, 155-162.

- Fleischmajer, R. and Timpl, R. (1984). Ultrastructural localization of fibronectin to different anatomic structures of human skin. *J. Histochem. Cytochem.* **32**, 315-321.
- Fuchs, E. (1990). Epidermal differentiation: the bare essentials. *J. Cell Biol.* **111**, 2807-2814.
- Geiger, B. and Ayalon, O. (1992). Cadherins. *Ann. Rev. Cell Biol.* **8**, 307-332.
- Giancotti, F. G. and Ruoslahti, E. (1990). Elevated levels of the  $\alpha_5\beta_1$  fibronectin receptor suppress the transformed phenotype of Chinese hamster ovary cells. *Cell* **60**, 849-859.
- Green, H. (1977). Terminal differentiation of cultured human epidermal cells. *Cell* **11**, 405-416.
- Grinnell, F. (1992). Wound repair, keratinocyte activation and integrin modulation. *J. Cell Sci.* **101**, 1-5.
- Hall, P. A. and Watt, F. M. (1989). Stem cells: the generation and maintenance of cellular diversity. *Development* **106**, 619-633.
- Hemler, M. E. (1990). VLA proteins of the integrin family: structures, functions, and their role on leukocytes. *Ann. Rev. Immunol.* **8**, 365-400.
- Hertle, M. D., Adams, J. C. and Watt, F. M. (1991). Integrin expression during human epidermal development in vivo and in vitro. *Development* **112**, 193-206.
- Hertle, M. D., Kubler, M.-D., Leigh, I. M. and Watt, F. M. (1992). Aberrant integrin expression during epidermal wound healing and in psoriatic epidermis. *J. Clin. Invest.* **89**, 1892-1901.
- Hogervorst, F., Kuikman, I., von dem Borne, A. E. G. Kr. and Sonnenberg, A. (1990). Cloning and sequence analysis of beta-4 cDNA: an integrin subunit that contains a unique 118 kd cytoplasmic domain. *EMBO J.* **9**, 765-770.
- Hogervorst, F., Admiraal, L. G., Niessen, C., Kuikman, I., Janssen, H., Daams, H. and Sonnenberg, A. (1993). Biochemical characterization and tissue distribution of the A and B variants of the integrin  $\alpha_6$  subunit. *J. Cell Biol.* **121**, 179-191.
- Hotchin, N. A. and Watt, F. M. (1992). Transcriptional and post-translational regulation of  $\beta_1$  integrin expression during keratinocyte terminal differentiation. *J. Biol. Chem.* **267**, 14852-14858.
- Hynes, R. O. (1992). Integrins: versatility, modulation and signaling in cell adhesion. *Cell* **69**, 11-25.
- Jones, J., Sugiyama, M., Watt, F. M. and Speight, P. M. (1993). Integrin expression in normal, hyperplastic, dysplastic, and malignant oral epithelium. *J. Pathol.* **169**, 235-243.
- Jones, P. H. and Watt, F. M. (1993). Separation of human epidermal stem cells from transit amplifying cells on the basis of differences in integrin function and expression. *Cell* **73**, 713-724.
- Juliano, R. L. and Haskill, S. (1993). Signal transduction from the extracellular matrix. *J. Cell Biol.* **120**, 577-585.
- Kim, J. P., Zhang, K., Kramer, R. H., Schall, T. J. and Woodley, D. T. (1992). Integrin receptors and RGD sequences in human keratinocyte migration: unique anti-migratory function of  $\alpha_3\beta_1$  epiligrin receptor. *J. Invest. Dermatol.* **98**, 764-770.
- Larjava, H., Peltonen, J., Akiyama, S. K., Yamada, S. S., Gralnick, H. R., Uitto, J. and Yamada, K. M. (1990). Novel function for  $\beta_1$  integrins in keratinocyte cell-cell interactions. *J. Cell Biol.* **110**, 803-815.
- Lee, E. C., Lotz, M. M., Steele, G. D. Jr. and Mercurio, A. M. (1992). The integrin  $\alpha_6\beta_4$  is a laminin receptor. *J. Cell Biol.* **117**, 671-678.
- Marchisio, P. C., Bondanza, S., Cremona, O., Cancedda, R. and De Luca, M. (1991). Polarized expression of integrin receptors ( $\alpha_6\beta_4$ ,  $\alpha_2\beta_1$ ,  $\alpha_3\beta_1$ , and  $\alpha_5\beta_5$ ) and their relationship with the cytoskeleton and basement membrane matrix in cultured human keratinocytes. *J. Cell Biol.* **112**, 761-773.
- McKay, I. A. and Leigh, I. M. (1991). Epidermal cytokines and their roles in cutaneous wound healing. *Br. J. Dermatol.* **124**, 513-518.
- Nazzaro, V., Berti, E., Cerri, A., Brusasco, A., Cavalli, R. and Caputo, R. (1990). Expression of integrin in junctional and dystrophic epidermolysis bullosa. *J. Invest. Dermatol.* **95**, 60-64.
- Nicholson, L. J. and Watt, F. M. (1991). Decreased expression of fibronectin and the  $\alpha_5\beta_1$  integrin during terminal differentiation of human keratinocytes. *J. Cell Sci.* **98**, 225-232.
- O'Toole, T. E., Loftus, J. C., Du, X., Glass, A. A., Ruggeri, Z. M., Shattil, S. J., Plow, E. F. and Ginsberg, M. H. (1990). Affinity modulation of the  $\alpha_{IIb}\beta_3$  integrin (platelet GPIIb-IIIa) is an intrinsic property of the receptor. *Cell Reg.* **1**, 883-893.
- Pellegrini, G., De Luca, M., Orecchia, G., Balzac, F., Cremona, O., Savoia, P., Cancedda, R. and Marchisio, P. C. (1992). Expression, topography, and function of integrin receptors are severely altered in keratinocytes from involved and uninvolved psoriatic skin. *J. Clin. Invest.* **89**, 1783-1795.
- Peltonen, J., Larjava, H., Jaakkola, S., Gralnick, H., Akiyama, S. K., Yamada, S. S., Yamada, K. M. and Uitto, J. (1989). Localization of integrin receptors for fibronectin, collagen, and laminin in human skin. Variable expression in basal and squamous cell carcinomas. *J. Clin. Invest.* **84**, 1916-1923.
- Potten, C. S. (1981). Cell replacement in epidermis (keratopoiesis) via discrete units of proliferation. *Int. Rev. Cytol.* **69**, 271-318.
- Ralfkiaer, E., Thomsen, K. and Vejlsgaard, G. L. (1991). Expression of a cell adhesion protein (VLA  $\beta$ ) in normal and diseased skin. *Br. J. Dermatol.* **124**, 527-532.
- Reilly, J. T. and Nash, J. R. (1988). Vitronectin (serum-spreading factor): its localisation in normal and fibrotic tissue. *J. Clin. Pathol.* **41**, 1269-1272.
- Rousselle, P., Lunstrum, G. P., Keene, D. R. and Burgesson, R. E. (1991). Kallinin: an epithelium-specific basement membrane adhesion molecule that is a component of anchoring filaments. *J. Cell Biol.* **114**, 567-576.
- Sheppard, D., Rozzo, C., Starr, L., Quaranta, V., Erle, D. J. and Pytela, R. (1990). Complete amino acid sequence of a novel integrin  $\beta$  subunit ( $\beta_6$ ) identified in epithelial cells using the polymerase chain reaction. *J. Biol. Chem.* **265**, 11502-11507.
- Staquet, M. J., Levarlet, B., Dezutter-Dambuyant, C., Schmitt, D. and Thivolet, J. (1990). Identification of specific human epithelial cell integrin receptors as VLA proteins. *Exp. Cell Res.* **187**, 277-283.
- Stenman, S. and Vaheri, A. (1978). Distribution of a major connective tissue protein, fibronectin, in normal human tissues. *J. Exp. Med.* **147**, 1054-1064.
- Stepp, M. A., Spurr-Michaud, S., Tisdale, A., Elwell, J. and Gipson, I. K. (1990).  $\alpha_6\beta_4$  integrin heterodimer is a component of hemidesmosomes. *Proc. Natl. Acad. Sci. USA* **87**, 8970-8974.
- Suzuki, S. and Naitoh, Y. (1990). Amino acid sequence of a novel integrin  $\beta_4$  subunit and primary expression of the mRNA in epithelial cells. *EMBO J.* **9**, 757-763.
- Symington, B. E., Takada, Y. and Carter, W. G. (1993). Interaction of integrins  $\alpha_3\beta_1$  and  $\alpha_2\beta_1$ : potential role in keratinocyte intercellular adhesion. *J. Cell Biol.* **120**, 523-535.
- Takeichi, M. (1991). Cadherin cell adhesion receptors as a morphogenetic regulator. *Science* **251**, 1451-1455.
- Tamura, R. N., Rozzo, C., Starr, L., Chambers, J., Reichardt, L. F., Cooper, H. M. and Quaranta, V. (1990). Epithelial integrin  $\alpha_6\beta_4$ : complete primary structure of  $\alpha_6$  and variant forms of  $\beta_4$ . *J. Cell Biol.* **111**, 1593-1604.
- Tamura, R. N., Cooper, H. M., Collo, G. and Quaranta, V. (1991). Cell type-specific integrin variants with alternative  $\alpha$  chain cytoplasmic domains. *Proc. Natl. Acad. Sci. USA* **88**, 10183-10187.
- Tenchini, M. L., Adams, J. C., Gilbert, C., Steel, J., Hudson, D. L., Malcovati, M. and Watt, F. M. (1993). Evidence against a major role for integrins in calcium-dependent intercellular adhesion of epidermal keratinocytes. *Cell Adhesion and Communication*, **1**, 55-66.
- Watt, F. M. (1988). The epidermal keratinocyte. *BioEssays* **8**, 163-167.
- Watt, F. M. (1989). Terminal differentiation of epidermal keratinocytes. *Current Opinion in Cell Biology* **1**, 1107-1115.
- Watt, F. M. (1991). Cell culture models of differentiation. *FASEB J.* **5**, 287-294.
- Watt, F. M. and Hertle, M. D. (1993). Keratinocyte integrins. In *Keratinocyte Handbook* (eds. I. M. Leigh, E. B. Lane, F. M. Watt). Cambridge: Cambridge University Press (In press).
- Watt, F. M. and Hotchin, N. A. (1992). Kallinin, epiligrin and GB3 antigen: kalinepiligrin-3? *Current Biology* **2**, 106-107.
- Watt, F. M. and Jones, P. H. (1992). Changes in cell-surface carbohydrate during terminal differentiation of human epidermal keratinocytes. *Biochem. Soc. Trans.* **20**, 285-288.
- Watt, F. M., Kubler, M.-D., Hotchin, N. A., Nicholson, L. J. and Adams, J. C. (1993). Regulation of keratinocyte terminal differentiation by integrin-extracellular matrix interactions. *J. Cell Sci.* **106**, 175-182.
- Watt, F. M., Jordan, P. W. and O'Neill, C. H. (1988). Cell shape controls terminal differentiation of human epidermal keratinocytes. *Proc. Natl. Acad. Sci. USA* **85**, 5576-5580.
- Wayner, E. A., Carter, W. G., Piotrowicz, R. S. and Kunicki, T. J. (1988). The function of multiple extracellular matrix receptors in mediating cell adhesion to extracellular matrix: preparation of monoclonal antibodies to the fibronectin receptor that specifically inhibit

- cell adhesion to fibronectin and react with platelet glycoproteins Ic-IIa. *J. Cell Biol.* **107**, 1881-1891.
- Wheelock, M. J. and Jensen, P. J.** (1992). Regulation of keratinocyte intercellular junction organization and epidermal morphogenesis by E-cadherin. *J. Cell Biol.* **117**, 415-425.
- Wolf, G. T., Carey, T. E., Schmaltz, S. P., McClatchey, K. D., Poore, J., Glaser, L., Hayashida, D. J. S. and Hsu, S.** (1990). Altered antigen expression predicts outcome in squamous cell carcinoma of the head and neck. *J. Natl. Cancer Inst.* **82**, 1566-1572.
- Yuan, Q., Jiang, W.-M., Leung, E., Hollander, D., Watson, J. D. and Krissansen, G. W.** (1992). Molecular cloning of the mouse integrin  $\beta 7$  subunit. *J. Biol. Chem.* **267**, 7352-7358.
- Yurchenco, P. D. and Schittny, J. C.** (1990). Molecular architecture of basement membranes. *FASEB J.* **4**, 1577-1590.
- Zambruno, G., Manca, V., Santantonio, M. L., Soligo, D. and Giannetti, A.** (1991). VLA protein expression on epidermal cells (keratinocytes, Langerhans cells, melanocytes): a light and electron microscopic immunohistochemical study. *Br. J. Dermatol.* **124**, 135-145.
